# Supplementary material for: Force-Induced Changes of PilY1 Drive Surface Sensing by Pseudomonas aeruginosa
Source: PubMed Central journal article supplement (PMC8806160; doi:10.1128/mbio.03754-21), 2022-02-01
Supplement: mbio.03754-21-st001.pdf [file mbio.03754-21-st001.pdf]

**Table S1. Strains used in this study**

| SMC #s/Strain Name            | Genotype/Description                                                  | Source |
|-------------------------------|-----------------------------------------------------------------------|--------|
| <b><i>E. coli</i> strains</b> |                                                                       |        |
| S17-1 $\lambda$ pir           | <i>thi pro hsdR- hsdM+ <math>\Delta</math>recA RP4-2::TcMu-Km::Tn</i> |        |
| BL21-DE3                      | Protein expression strain                                             | NEB    |

***P. aeruginosa* strains**

|      |                                                                  |            |
|------|------------------------------------------------------------------|------------|
| 232  | PA14-UCBPP wildtype (WT)                                         | [1]        |
| 8929 | WT mKate pPcdrA::GFP                                             | [2]        |
|      | C152S pPcdrA::GFP                                                | This study |
| 3718 | $\Delta$ <i>pilY1</i>                                            | [3]        |
| 7445 | $\Delta$ <i>vWA<sub>p</sub></i> (amino acids S178-S365)          | This study |
| 9142 | $\Delta$ <i>vWA<sub>r</sub></i>                                  | This study |
| 9144 | PilY1-C147S                                                      | This study |
| 9146 | PilY1-C152S                                                      | This study |
| 9148 | PilY1-C168S                                                      | This study |
| 9150 | PilY1-C232S                                                      |            |
| 9152 | PilY1-C232S C241S                                                | This study |
| 9154 | PilY1-all seven cysteines in vWA mutated to serine               | This study |
| 9156 | PilY1-all cysteines in vWA mutated to serine except C300         | This study |
| 9158 | PilY1 from WT PAO1 swapped in for PA14's PilY1                   | This study |
| 9160 | PilY1 from IPCD83 swapped in for PA14's PilY1                    | This study |
| 9082 | $\Delta$ <i>pilA</i>                                             | [4]        |
| 9135 | $\Delta$ <i>pilA</i> empty vector                                | This study |
| 9119 | $\Delta$ <i>pilA</i> pPilY1-His                                  | This study |
| 9120 | $\Delta$ <i>pilA</i> pPilY1 $\Delta$ <i>vWA<sub>r</sub></i> -His | This study |
| 9121 | $\Delta$ <i>pilA</i> pPilY1-C152S-His                            | This study |

## References

1. Rahme, L.G., et al., *Common virulence factors for bacterial pathogenicity in plants and animals*. Science, 1995. **268**(5219): p. 1899-902.
2. Webster, S.S., et al., *Interaction between the type 4 pili machinery and a diguanylate cyclase fine-tune c-di-GMP levels during early biofilm formation*. Proc Natl Acad Sci U S A, 2021. **118**(26).
3. Bohn, Y.S., et al., *Multiple roles of Pseudomonas aeruginosa TBCF10839 PilY1 in motility, transport and infection*. Mol Microbiol, 2009. **71**(3): p. 730-47.
4. Luo, Y., et al., *A hierarchical cascade of second messengers regulates Pseudomonas aeruginosa surface behaviors*. mBio, 2015. **6**(1).
