# Supplementary material for: Force-Induced Changes of PilY1 Drive Surface Sensing by Pseudomonas aeruginosa
Source: PubMed Central journal article supplement (PMC8806160; doi:10.1128/mbio.03754-21), 2022-02-01
Supplement: mbio.03754-21-st002.pdf [file mbio.03754-21-st002.pdf]

**Table S2. Plasmids used in this study**

| Plasmid                       | Description                                                                             | Source/SMC #                                                                |
|-------------------------------|-----------------------------------------------------------------------------------------|-----------------------------------------------------------------------------|
| pMQ30                         | Shuttle vector for yeast cloning and Gram-negative allelic replacement, Gm <sup>r</sup> |                                                                             |
|                               | vWA <sub>p</sub> KI construct, Gm <sup>r</sup>                                          | This study/7254                                                             |
|                               | vWA <sub>f</sub> KI construct, Gm <sup>r</sup>                                          | This study/9141                                                             |
|                               | PilY1-C147S KI construct, Gm <sup>r</sup>                                               | This study/9143                                                             |
|                               | PilY1-C152S KI construct, Gm <sup>r</sup>                                               | This study/9145                                                             |
|                               | PilY1-C168S KI construct, Gm <sup>r</sup>                                               | This study/9146                                                             |
|                               | PilY1-C232S KI construct, Gm <sup>r</sup>                                               | This study/9148                                                             |
|                               | PilY1-C232S C241S KI construct, Gm <sup>r</sup>                                         | This study/9150                                                             |
|                               | PilY1-all cysteines mutated to serine KI construct, Gm <sup>r</sup>                     | This study/9152                                                             |
|                               | PilY1-all cysteines mutated to serine except C300 KI construct, Gm <sup>r</sup>         | This study/9154                                                             |
|                               | PAO1's pilY1 KI (to KI to PA14)                                                         | This study/9156                                                             |
|                               | IPCD83's pilY1 KI (to KI to PA14)                                                       | This study/9158                                                             |
|                               | pMQ72                                                                                   | expression vector with arabinose-inducible gene expression; Gm <sup>r</sup> |
| pPilY1-His                    |                                                                                         | This study/9171                                                             |
| pPilY1 ΔvWA <sub>f</sub> -His |                                                                                         | This study/9172                                                             |
| pPilY1-C152S-His              |                                                                                         | This study/9173                                                             |
| pGEX-GST expression plasmid   | *vWA <sub>f</sub> -His                                                                  | This study/9126                                                             |
|                               | *vWA <sub>f</sub> -C152S-His                                                            | This study/9136                                                             |

\*Sequence codon optimized for E. coli  
KI – knock in

1. Shanks, R.M., et al., *Saccharomyces cerevisiae*-based molecular tool kit for manipulation of genes from gram-negative bacteria. *Appl Environ Microbiol*, 2006. 72(7):5027-36.
