# Supplementary material for: Force-Induced Changes of PilY1 Drive Surface Sensing by Pseudomonas aeruginosa
Source: PubMed Central journal article supplement (PMC8806160; doi:10.1128/mbio.03754-21), 2022-02-01
Supplement: mbio.03754-21-st003.pdf [file mbio.03754-21-st003.pdf]

**Table S3. Oligonucleotides used in this study**

| Primer Name                | Primer Sequence (5' – 3')                                         | Purpose                                         |
|----------------------------|-------------------------------------------------------------------|-------------------------------------------------|
| QC vWA C147S-F             | cgccctcaatggggaaccggctggctgtagcatcgatagcagctgc<br>aataccgggag     | Site-directed<br>mutagenesis                    |
| QC vWA C147S-R             | ctcccggattgcagctgctatcgatgctaccaagccagccggtcccc<br>attgagggcg     | Site-directed<br>mutagenesis                    |
| QC vWA C152S-F             | ccggctggctggttgcatcgatagcagcagcaataaccgggagagctt<br>attactatac    | Site-directed<br>mutagenesis                    |
| QC vWA C152S-R             | Gtatagtaataagctctcccggtattgctgctgctatcgatgcaaccaag<br>ccagccgg    | Site-directed<br>mutagenesis                    |
| QC vWA C168S-F             | ctatactataaggtaagcgctagcagccctgcacagccggtgagcag<br>ctccaactcc     | Site-directed<br>mutagenesis                    |
| QC vWA C168S-R             | ggagttggagctgctcaccggctgtgcagggctgctagcgcttaccttat<br>aagtatag    | Site-directed<br>mutagenesis                    |
| QC PiiY1 C232S-F           | gtctcacttggggggccctgaacaccagtagcatcgcgccaacagc<br>agaagctgcc      | Site-directed<br>mutagenesis                    |
| QC PiiY1 C232S-R           | ggcagcttctgctgttggcgccgatgctactggtgttcagggccccca<br>agtgagac      | Site-directed<br>mutagenesis                    |
| QC PiiY1 S300C-F           | ccaccgaagacggaaagacatattctgcccgggcccagctatcacatc<br>atgatgac      | Site-directed<br>mutagenesis                    |
| QC PiiY1 S300C-R           | gtcatcatgatgtgatagctggcccggcaggaatatgtctttccgtcttcg<br>gtgg       | Site-directed<br>mutagenesis                    |
| QC PiiY1C300S F            | ccaccgaagacggaaagacatattccagcccgggcccagctatcacat<br>catgatgaccgac | Site-directed<br>mutagenesis                    |
| QC PiiY1 C300S R           | gtcggatcatgatgatgatagctggcccggctggaatatgtctttccgtct<br>tcgggtgg   | Site-directed<br>mutagenesis                    |
| QC PiiY1_C232/241S<br>F    | gggcctgaacaccagcagcatcgcgccaacagcagaagcagcc<br>aaaacaatgccctg     | Site-directed<br>mutagenesis                    |
| QC<br>PiiY1_C232/241S_R    | cagggcattgtttggctgcttctgctgttggcgccgatgctgctggtgttca<br>gggccc    | Site-directed<br>mutagenesis                    |
| QC vWA-His C152S F<br>pGEX | ggttggctggatgcatcgattcctcatccaatactggccgcgcttactac<br>tatac       | For making point<br>mutation in pGEX<br>plasmid |
| QC vWA-His C152S R<br>pGEX | gtatagtagtaagcgcgccagttattggatgaggaatcgatgcatcca<br>agccaacc      | For making point<br>mutation in pGEX<br>plasmid |
| vWA5A KI-F                 | ccagtccaagcttgcattgctgcaggtcgactttccaacatgcgcga<br>ggtgtcactg     | For making eukaryotic<br>vWA KI in pMQ30        |

|                                  |                                                                 |                                                                                                                                          |
|----------------------------------|-----------------------------------------------------------------|------------------------------------------------------------------------------------------------------------------------------------------|
| vWA5A KI-R                       | attacgaattcgagctcggtagccggggatcctggagctcggttgtccagcagtgcgcc     | For making eukaryotic vWA KI in pmQ30                                                                                                    |
| IPCD83 F                         | gtataccaactgactggagccagcgcATGAAATCGGCACTC<br>CACCAGATCGGCAAG    | Forward primer with homology to <i>pilY1</i> from IPCD83. Highlighted region is homologous to region upstream of PA14's <i>pilY1</i> .   |
| IPCD83 R                         | gagctgtggcgagaagacgtaaggggtcatgTCAGTTCTTTC<br>CTTCGATGGGGCGC    | Reverse primer with homology to <i>pilY1</i> from IPCD83. Highlighted region is homologous to region downstream of PA14's <i>pilY1</i> . |
| <i>pilY1</i> -KI F               | tgtaaacgacggccagtgccaagcttcatGCCTGCCATAC<br>CTCTCGACAGCAGGGAT   | Forward primer with homology to <i>pilY1</i> to pmQ30 (red).                                                                             |
| <i>pilY1</i> -KI R               | ccatgattacgaattcgagctcggtagccgggATCCGATAACC<br>TCCGTCGTTGGCTAC  | Reverse primer with homology to <i>pilY1</i> to pmQ30 (red).                                                                             |
| PAO1 <i>PilY1</i> PA14 up F      | gtgccaagcttcatgcctgcaggtcactTTTTCAATACCATC<br>AAGCCCCCAGAGGTC   | Forward primer to amplify upstream region of PA14's <i>PilY1</i> . Region in red highlight homology to pmQ30 plasmid                     |
| PAO1 <i>PilY1</i> PA14 up R      | tcttgccgatctggtggagtaccgatttcatgCGCTGGCTCCAG<br>TCAGTTGGTATACAG | Forward primer to amplify upstream region of PA14's <i>PilY1</i> . Region in red highlight homology to pmQ30 plasmid                     |
| <i>PilY1</i> PAO1 gene 14 tail F | ctgtataccaactgactggagccagcgcATGAAATCGGTACT<br>CCACCAGATCGGCAAGA | Forward primer to amplify PAO1's <i>PilY1</i> . Region in red highlight homology upstream of PA14's <i>PilY1</i>                         |
| <i>PilY1</i> PAO1 gene 14 tail R | gcgagaagacgtaaggggtcatgTCAGTTCTTTCCTTCG<br>ATGGGGCGCCAGTTC      | Reverse primer to amplify PAO1's <i>PilY1</i> . Region in red highlight homology downstream of PA14's <i>PilY1</i>                       |
| <i>PilY1</i> PAO1 downstream-F   | gaactggcgcccatcgaaggaaagaactgaACATGAACCC<br>CTTACGTCTTCTCGC     | Forward primer to amplify downstream region of PA14's <i>PilY1</i> . Region in red highlight homology to PAO1's <i>PilY1</i> plasmid     |
| <i>PilY1</i> PAO1 downstream-R   | attacgaattcgagctcggtagccggggatcctGTGAAAAATAG<br>CGCTCTTGAGTAGC  | Reverse primer to amplify downstream region of PA14's <i>PilY1</i> . Region in red                                                       |

|                         |                                                            |                                                                                                                                                               |
|-------------------------|------------------------------------------------------------|---------------------------------------------------------------------------------------------------------------------------------------------------------------|
|                         |                                                            | highlight homology to PAO1's PilY1 plasmid                                                                                                                    |
| pPilY1-His_pmQ72 F      | ctagcgaattcgagctcggtacgaaggagatatacatatgatccaccagattaccgcg | Forward primer to amplify pilY1 and insert in pmQ72 multi-copy plasmid. Regions in green and red represent the RBS and homology to the plasmid, respectively. |
| pPilY1-His pmQ72 R kpn1 | gaggatccccgggtacTCAgtggtgatggtggtggtgtttctcctcgacgaccgccag | Reverse primer to amplify pilY1 and insert in pmQ72 multi-copy plasmid. Regions in blue and red are the His tag and homology to the plasmid, respectively.    |
